# Supplementary material for: Crystalline Quality and Surface Morphology Improvement of Face-to-Face Annealed MBE-Grown AlN on h-BN
Source: MDPI journal article supplement (doi:10.3390/ma15238602), 2022-12-02
Supplement: s1 [file s1]

Supplementary Material

# Crystalline Quality and Surface Morphology Improvement of Face-to-Face Annealed MBE-Grown AlN on h-BN

Aly Zaiter <sup>1,\*</sup>, Adrien Michon <sup>1</sup>, Maud Nemoz <sup>1</sup>, Aimeric Courville <sup>1</sup>, Philippe Vennégues <sup>1</sup>, Vishnu Ottapilakkal <sup>2</sup>,  
Phuong Vuong <sup>2</sup>, Suresh Sundaram <sup>2,3,4</sup>, Abdallah Ougazzaden <sup>2,3</sup> and Julien Brault <sup>1,\*</sup>

<sup>1</sup> Université Côte d'Azur, CNRS-CRHEA, French National Center for Scientific Research, 06560 Valbonne, France; adrien.michon@crhea.cnrs.fr (A.M.); maud.nemoz@crhea.cnrs.fr (M.N.); aimeric.courville@crhea.cnrs.fr (A.C.); philippe.vennegues@crhea.cnrs.fr (P.V.)

<sup>2</sup> French National Center for Scientific Research, IRL 2958 Georgia Tech, 2 rue Marconi, 57070 Metz, France; vishnu.ottapilakkal@georgiatech-metz.fr (V.O.); pvuong@georgiatech-metz.fr (P.V.); suresh.sundaram@georgiatech-metz.fr (S.S.); abdallah.ougazzaden@georgiatech-metz.fr (A.O.)

<sup>3</sup> Georgia Institute of Technology, School of Electrical and Computer Engineering, Atlanta, GA 30332-0250, USA

<sup>4</sup> Georgia Tech-Lorraine, 2 rue Marconi, 57070 Metz, France

\* Correspondence: aly.zaiter@crhea.cnrs.fr (A.Z.); julien.brault@crhea.cnrs.fr (J.B.)

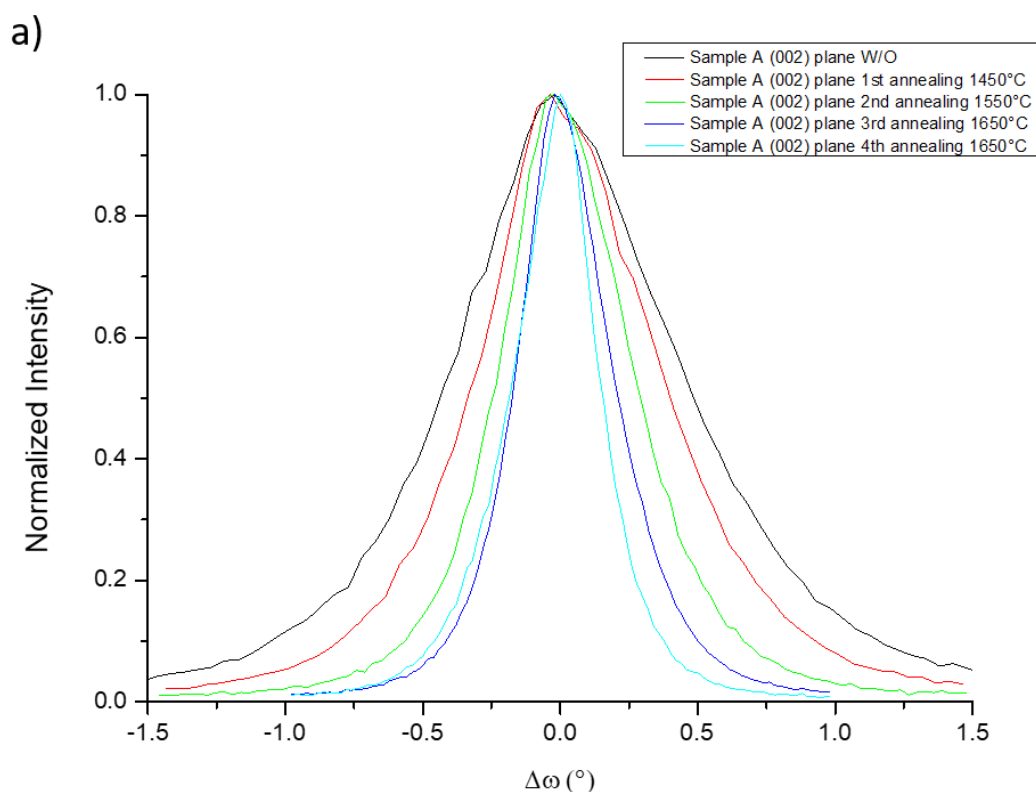

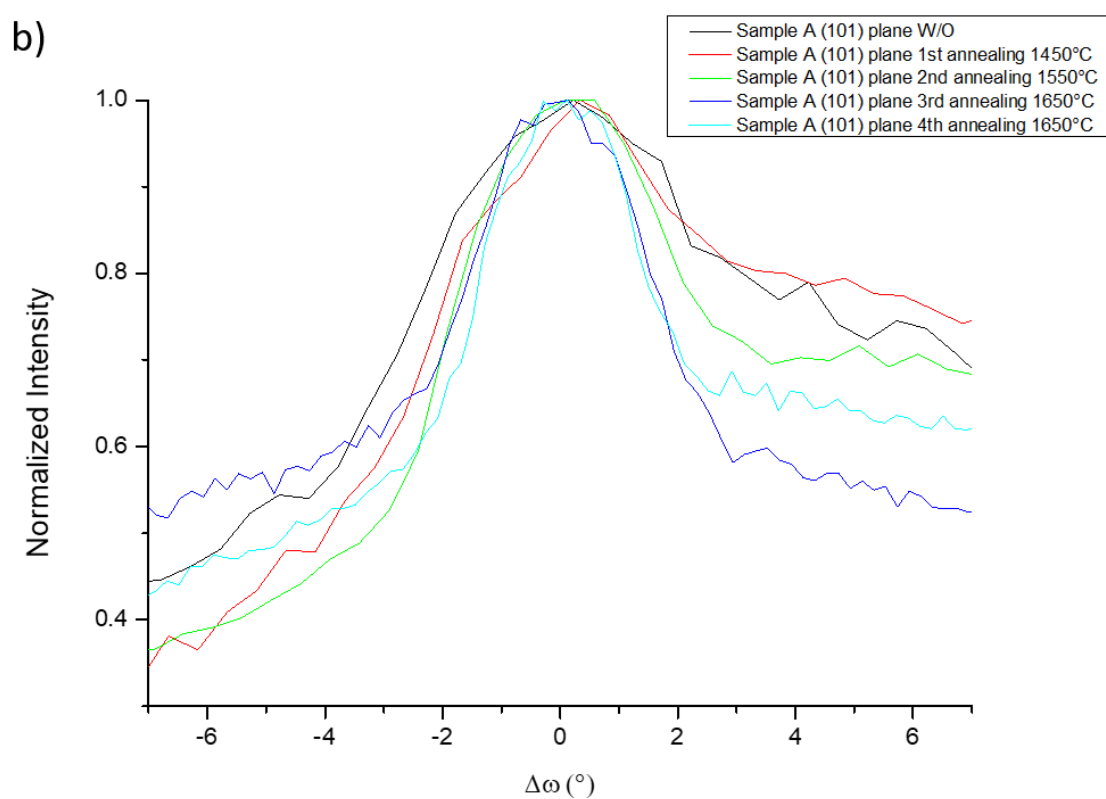

**Figure S1.**  $\omega$ -scan of AlN (sample A) before and after FFA: (a) for the symmetric plane (0 0 0 2), (b) for the skew symmetric plane (1 0 -1 1).

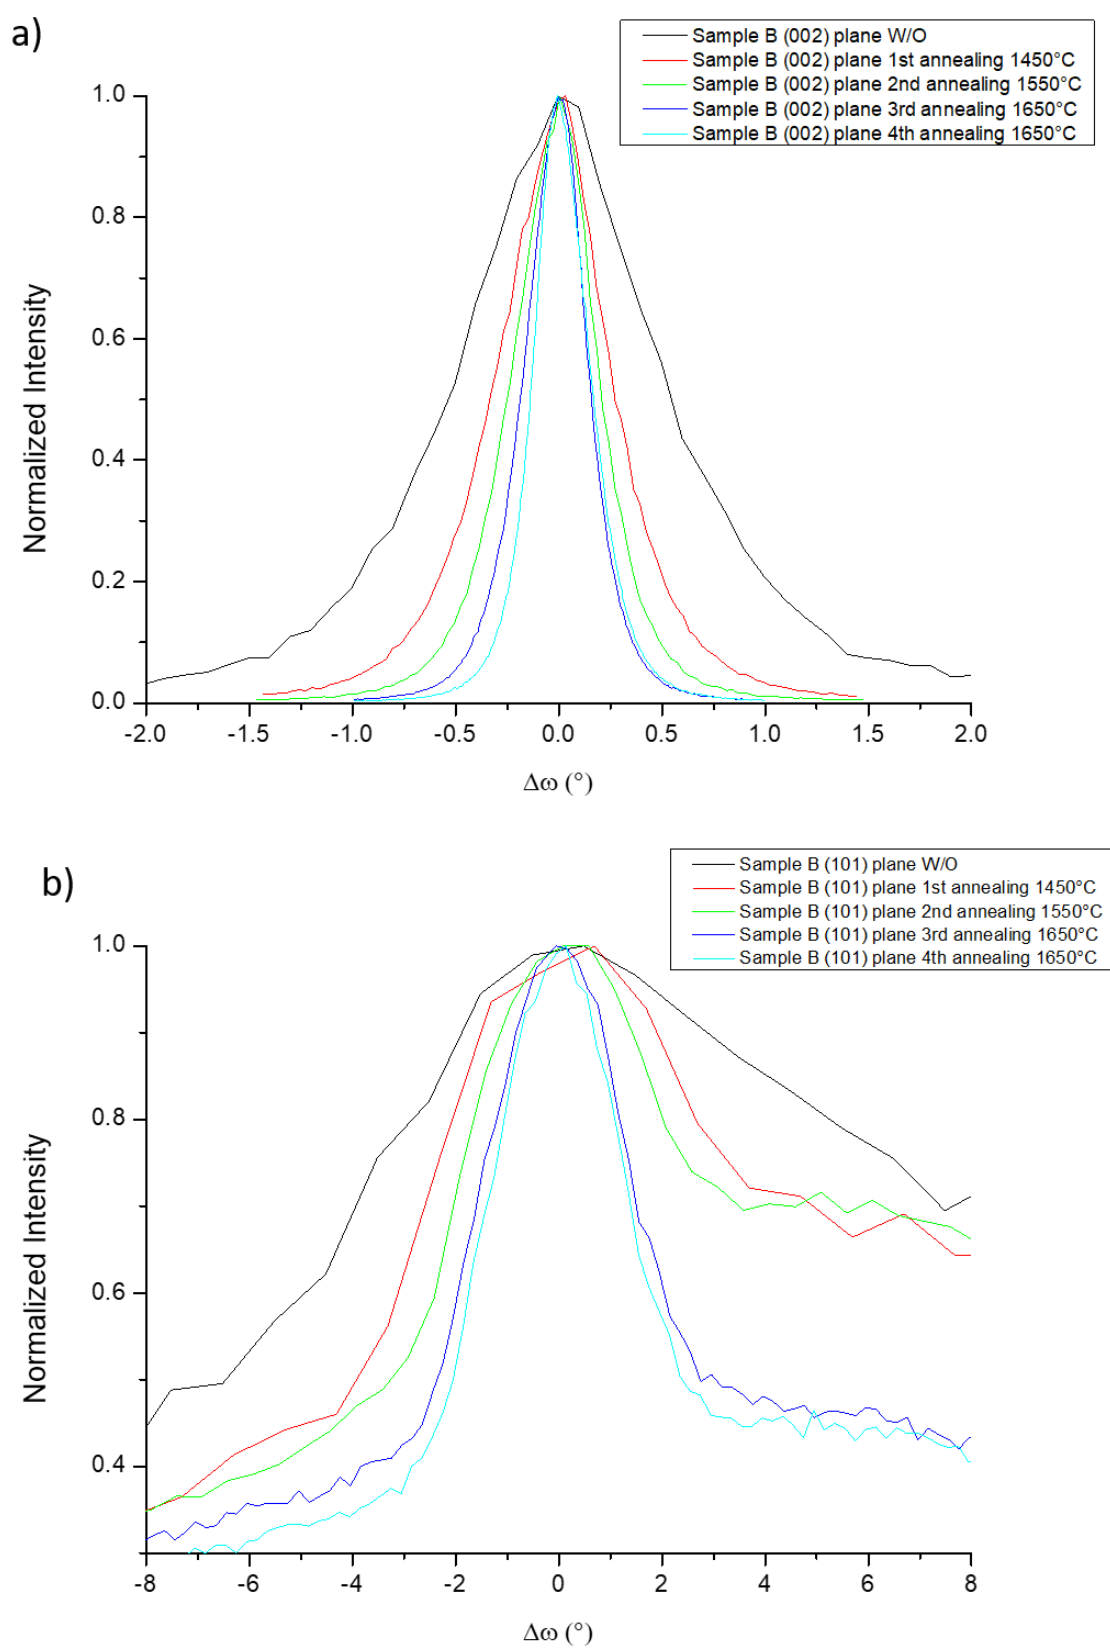

**Figure S2.**  $\omega$ -scan of AlN (sample B) before and after FFA: (a) for the symmetric plane (0 0 0 2), (b) for the skew symmetric plane (1 0 -1 1).

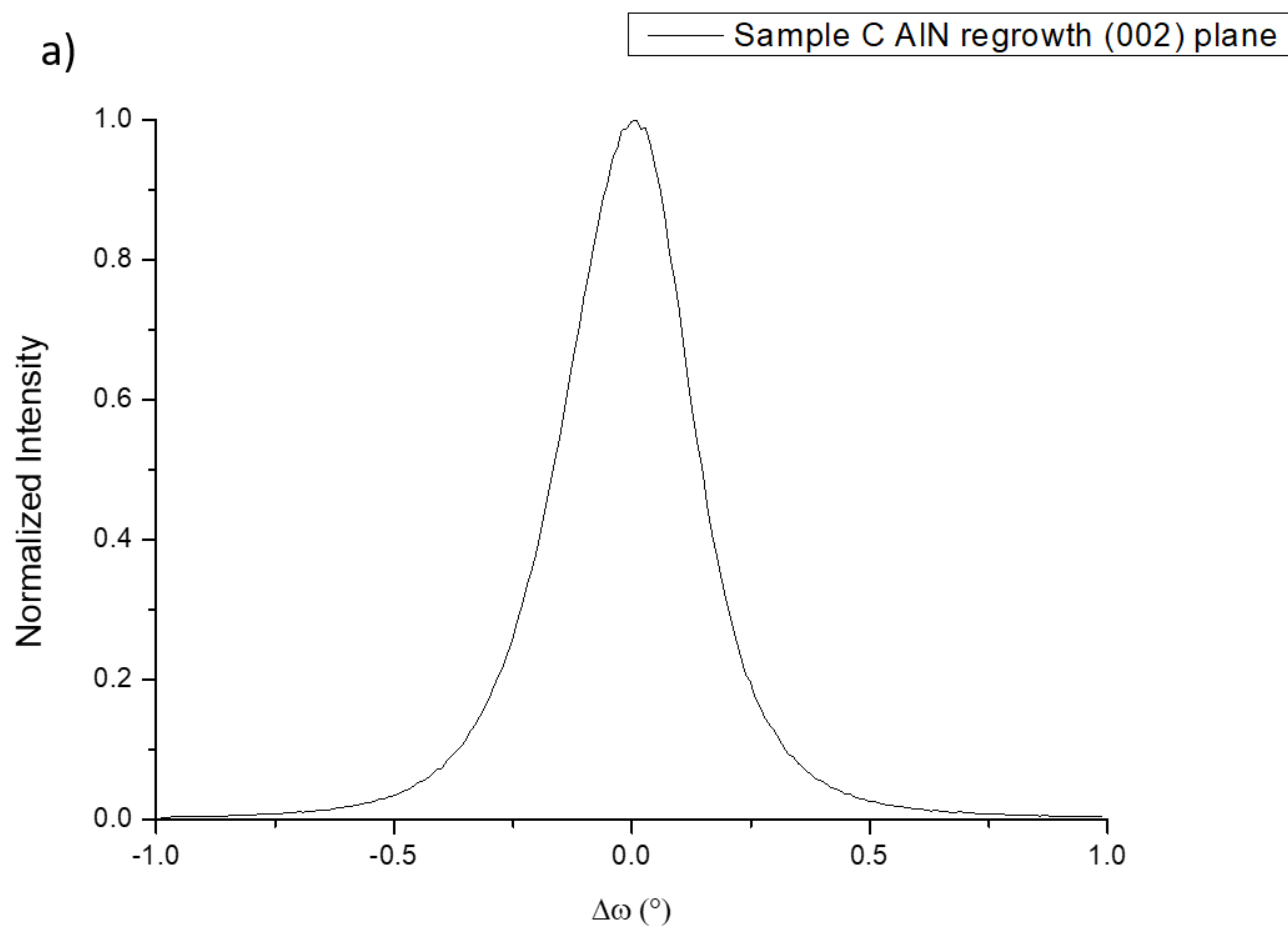

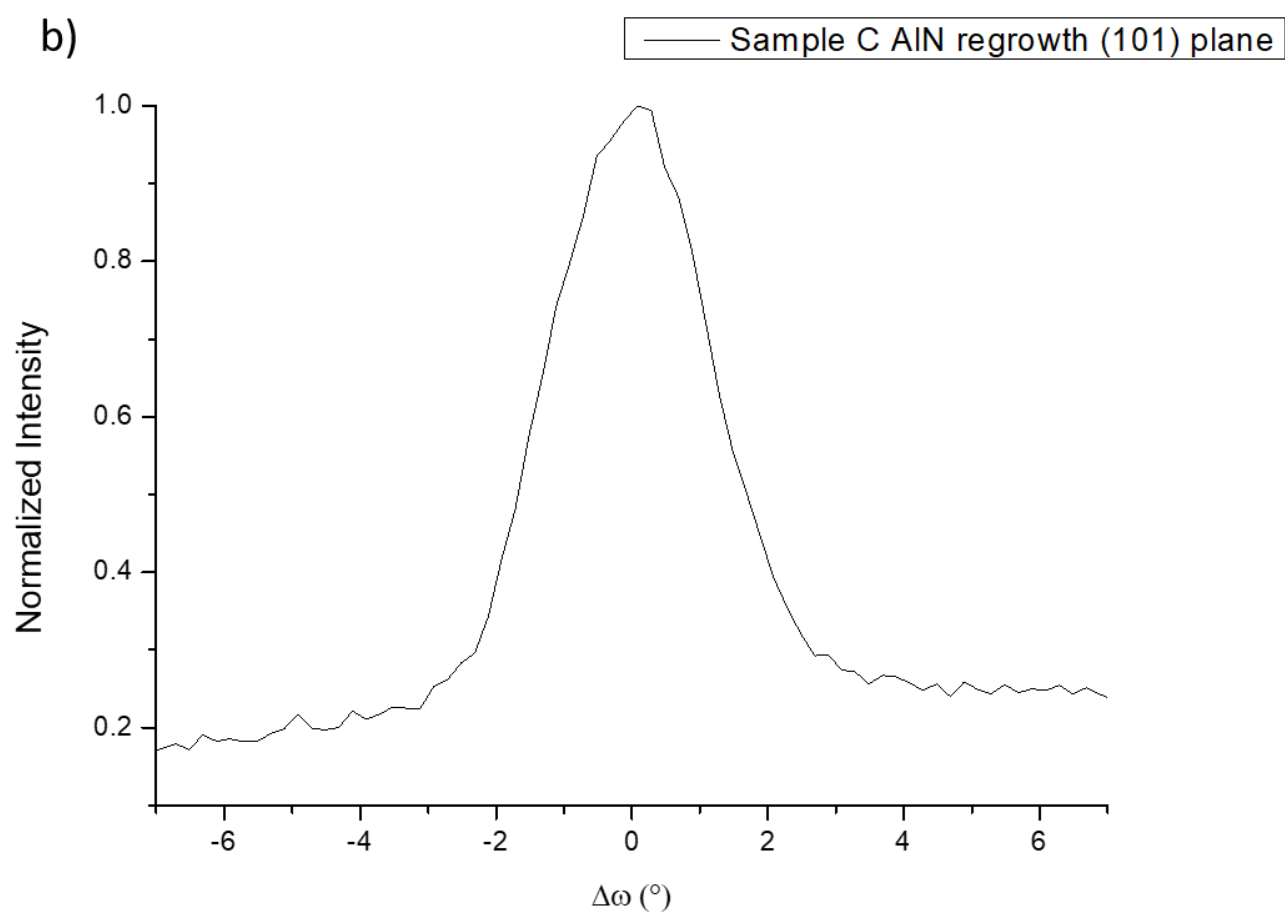

**Figure S3.**  $\omega$ -scan of AlN (sample C) after regrowth: (a) for the symmetric plane (0 0 0 2), (b) for the skew symmetric plane (1 0 -1 1).
